# Supplementary material for: Optical Imaging of Tumor Response to Hyperbaric Oxygen Treatment and Irradiation in an Orthotopic Mouse Model of Head and Neck Squamous Cell Carcinoma
Source: PubMed Central journal article supplement (PMC4768231; doi:10.1007/s11307-015-0834-8), 2015-02-28
Supplement: 11307_2015_834_MOESM1_ESM.pdf [file 11307_2015_834_MOESM1_ESM.pdf]

## Supplemental Information

# Optical Imaging of Tumor Response to Hyperbaric Oxygen Treatment and Irradiation in an Orthotopic Mouse Model of Head and Neck Squamous Cell Carcinoma

### Journal: Molecular Imaging and Biology

Joanna A.M. Braks<sup>1</sup>, Linda Spiegelberg<sup>1</sup>, Senada Koljenovic<sup>2</sup>, Yanto Ridwan<sup>3</sup>, Stijn Keereweer<sup>4</sup>, Roland Kanaar<sup>3,5</sup>, Eppo B. Wolvius<sup>1</sup>, Jeroen Essers<sup>3,5,6</sup>

<sup>1</sup> Department of Oral and Maxillofacial Surgery, Erasmus Medical Center, PO Box 2040 3000 CA Rotterdam, the Netherlands.

<sup>2</sup> Department of Pathology, Erasmus Medical Center, PO Box 2040, 3000 CA Rotterdam, the Netherlands.

<sup>3</sup> Department of Genetics, Erasmus Medical Center, PO Box 2040, 3000 CA Rotterdam, the Netherlands.

<sup>4</sup> Department of Otorhinolaryngology and Head & Neck Surgery, Erasmus Medical Center, PO Box 1738, 3015 CE Rotterdam, Netherlands.

<sup>5</sup> Department of Radiation Oncology, Erasmus Medical Center, PO Box 2040, 3000 CA Rotterdam, the Netherlands.

<sup>6</sup> Department of Vascular Surgery, Erasmus Medical Center, PO Box 2040, 3000 CA Rotterdam, the Netherlands.

#### Corresponding authors

Joanna A.M. Braks, PhD.

Department of Oral & Maxillofacial Surgery, Erasmus Medical Center

Room Ee 230

PO Box 2040

3000 CA Rotterdam, the Netherlands

Phone: +31 10 7038870/ +31 6 25534491

Fax: +31 10 7044685

Email: [j.braks@erasmusmc.nl](mailto:j.braks@erasmusmc.nl)

Jeroen Essers, PhD.

Department of Genetics, Erasmus Medical Center

Room Ee 669

PO Box 2040

3000 CA Rotterdam, the Netherlands

Phone: +31 10 7043604

Fax: +31 10 7044743

Email: [j.essers@erasmusmc.nl](mailto:j.essers@erasmusmc.nl)

Table S1

Primers used for qPCR

| mRNA          | Forward (5'-3')        | Reverse (5'-3')       |
|---------------|------------------------|-----------------------|
| VEGF          | CGAAACCATGAACTTTCTGCTG | TCCATGAACTTCACCACTTCG |
| CAIX          | AGGGGTCTCTGACTACACCG   | GAGGGTGTGGAGCTGCTTAG  |
| CDH1          | AATCCCACCACGTACAAGGG   | GTGTATACAGCCTCCCACGC  |
| Vim           | AGGAGGAAATGGCTCGTCAC   | AGAAATCCTGCTCTCCTCGC  |
| Snail         | CCAGTGCCTCGACCACTATG   | CTGCTGGAAGGTAACTCTGG  |
| TGF $\beta$ 1 | CGTGGAGGGGAAATTGAGGG   | CCGTTGATGTCCAATTGCAG  |
| GAPDH         | CACCGTCAAGGCTGAGAACG   | GAGGGATCTCGCTCCTGGAAG |

Table S2

Increase of tumor bioluminescence signals after xenografting FaDu tumor cells in the floor of the mouth (9-12 mice per group). RT: radiation therapy, HBOT: hyperbaric oxygen therapy.

|         |   | Relative tumor bioluminescence (fold increase compared to day 4 $\pm$ SEM) |                  |                  |                    |                  |        |
|---------|---|----------------------------------------------------------------------------|------------------|------------------|--------------------|------------------|--------|
|         |   | day 4                                                                      | day 7            | day 11           | day 14             | day 18           | day 22 |
| control | 1 | 3.12 $\pm$ 0.24                                                            | 10.26 $\pm$ 1.17 | 27.41 $\pm$ 3.25 | 74.05 $\pm$ 7.93   |                  |        |
| HBOT    | 1 | 3.08 $\pm$ 0.17                                                            | 11.86 $\pm$ 0.91 | 31.57 $\pm$ 2.44 | 116.40 $\pm$ 15.58 |                  |        |
| RT      | 1 | 2.60 $\pm$ 0.21                                                            | 2.70 $\pm$ 0.37  | 4.93 $\pm$ 0.89  | 13.72 $\pm$ 2.97   | 26.98 $\pm$ 5.73 |        |
| RT+HBOT | 1 | 2.66 $\pm$ 0.15                                                            | 3.20 $\pm$ 0.45  | 6.04 $\pm$ 0.89  | 14.96 $\pm$ 2.44   | 28.24 $\pm$ 5.87 |        |
